# Supplementary material
Source: HighWire-hosted journal article supplement (https://bmjopen.bmj.com/content/14/4/e081549)
Supplement: inline-supplementary-material-1 [file inline-supplementary-material-1.pdf]

Appendix Table 1. Trends in fall experience rate according to self-rated oral health, KCHS 2011–2019

|              | 2011               | 2013               | 2015               | 2017               | 2019                | $\beta$ | <i>p</i> -value |
|--------------|--------------------|--------------------|--------------------|--------------------|---------------------|---------|-----------------|
| <b>Men</b>   |                    |                    |                    |                    |                     |         |                 |
| Good         | 14.6 (13.56–15.93) | 15.8 (14.69–16.86) | 11.8 (10.84–12.66) | 11.5 (10.55–12.36) | 10.9 (10.17–11.61)  | -0.34   | <0.001          |
| Poor         | 19.6 (18.62–20.59) | 20.0 (19.05–21.02) | 15.9 (15.08–16.77) | 15.1 (14.25–15.88) | 15.6 (14.78–16.42)  | -0.28   | <0.001          |
| <b>Women</b> |                    |                    |                    |                    |                     |         |                 |
| Good         | 22.2 (20.94–23.45) | 23.4 (22.31–24.49) | 20.7 (19.69–21.66) | 18.7 (17.78–19.57) | 17.5 (16.7–18.27)   | -0.29   | <0.001          |
| Poor         | 28.4 (27.47–29.34) | 30.0 (29.07–30.94) | 25.8 (24.97–26.71) | 24.2 (23.41–25.06) | 23.43 (22.63–24.23) | -0.26   | <0.001          |

Values are presented as weighted % (95% confidence interval). KCHS, Korea Community Health Survey
